# Supplementary material
Source: HighWire-hosted journal article supplement (https://jnm.snmjournals.org/highwire/filestream/94588/field_highwire_adjunct_files/0/137034_Supplemental_Data.pdf)

## Supplemental Methods:

### *Quantitative PCR*

Total RNA was isolated using the Total RNA purification Kit (Norgen Biotek Corp) with on-column DNase-I treatment. RNA concentrations were determined by measuring the spectrophotometric absorption at 260 nm using the GeneQuant (Amersham). cDNA synthesis was performed using 500 ng total RNA and 8  $\mu$ l 5X iScript reaction mix (Bio-Rad) containing oligo dT primers, with a total volume of 40  $\mu$ l. cDNA synthesis was performed using a heating block. Samples were denatured for 10 min at 70  $^{\circ}$ C and cDNA synthesis was performed for 60 min at 42  $^{\circ}$ C, followed by an enzyme inactivation step for 5 min at 99  $^{\circ}$ C. Quantitative PCR (qPCR) was performed to determine the expression levels of HK-2, GLUT-3 and  $\beta$ 2 Microglobulin ( $\beta$ 2M) mRNAs in 22 PPGL tumor tissues. The primers used for the reactions are as follows: HK-2 Forward Primer 5' TCAGATTGAGAGTGACTGCC 3' and Reverse Primer 5' TTTCTCGTATCCTGTCCACC 3' GLUT-3 Forward Primer 5' GTGGCCCAGATCTTTGGTC 3' and Reverse Primer 5' AAGGGCTGCACTTTGTAGG 3'  $\beta$ 2M Forward Primer 5'ATGAGTATGCCTGCCGTGTG 3' Reverse Primer 5'CCAAATGCGGCATCTTCAAAC3'. Reactions were performed using SYBR green PCR master mix (Applied Biosystems). cDNA equivalent of 10 ng total RNA was used for each reaction and the reactions were performed in a total volume of 10  $\mu$ l in ABI Prism 7500 sequence detector (Applied Biosystems). The amplification reactions were carried out with denaturation at 95  $^{\circ}$ C for 10 min, 40 cycles of 15 s at 95  $^{\circ}$ C (melting), and 60 s at 60  $^{\circ}$ C (annealing and elongation). The expression of the mRNAs was calculated relative to the levels of the internal control gene  $\beta$ 2M. The relative expression levels were determined by the  $2^{-\Delta C_t}$  method.

### *Immunohistochemical staining and quantification*

Tumor tissue sections were deparaffinized, rehydrated and washed with 50 mM phosphate buffered saline (PBS). Antigen retrieval was performed by boiling the sections in 10 mM citrate, pH 6.0 in a microwave for 3 minutes at 850W followed by 10 minutes at 150 W. Endogenous peroxidase activity was blocked with 3% hydrogen peroxide ( $H_2O_2$ ) in PBS for 30 minutes. For HK-1, 2 and 3 staining,

endogenous peroxidase activity was blocked by incubation with 0.6%  $\text{H}_2\text{O}_2$  in 40% methanol and 60% 50 mM PBS for 30 minutes. Subsequently, the sections were washed with PBS. Non-specific interactions were blocked using normal human serum (5% in PBS for 30 minutes) for HK-1, 2 and 3, normal goat serum (20% in PBS) for VEGF, MCT-4, (30 minutes) GLUT-1 and -3 (10 minutes) respectively. For GLUT-1 prior to incubation with the primary antibody, avidin and biotin block (Vector Laboratories, SP-2001) was performed for 15 minutes each. Primary antibody diluted in 0.1% BSA/PBS was applied (Supplemental Table 2) for 60 minutes for HK-1, HK-2, HK-3, CD34 and GLUT-3, 90 minutes for MCT-4 and overnight for GLUT-1 and VEGF at 4 °C. The sections were then washed with 50 mM PBS, followed by incubation with the secondary antibody for 30 minutes (Supplemental Table 2). Slides stained for HK-1, HK-2, HK-3 and GLUT-1 were incubated with avidin biotin reagent (Vectastain Elite ABC Kit, Vector Laboratories, PK6100) for 45 minutes. The sections were washed with PBS and incubated with 3,3-diaminobenzidine (DAB) (Immunologic, BS04-110) for 10 minutes. After washing DAB with running tap water for 5 minutes, the sections were counterstained with hematoxylin for 10 seconds, washed and dehydrated in ethanol series (50%, 70%, 100%) followed by xylene and mounted with permount.

Expression of various markers was quantified by evaluating the amount of DAB staining by an experienced pathologist (BK) who was unaware of the patient's clinical data while CD34 was scored automatically. The percentage of the positive stained area of the sections was graded in a scale ranging from 0-100%. The intensity of the DAB color was graded as non-staining (0), faint staining (I), medium staining (II) and intense staining (III), ignoring the background color of the staining. Areas containing adrenal cortex, brown fat and capillaries were used as controls for comparison between different sections. The intensity of each marker was evaluated separately. Cytoplasmic staining was evaluated for HK-1, HK-2, HK-3 and VEGF. For GLUT-1, GLUT-3 and MCT-4 cytoplasmic and/or membrane staining was graded as they were expressed both in the cytoplasm and membrane. The score of the staining represents the expression of the markers and is based on the multiplication of the intensity with the percentage of the positive stained area.

For CD34 scoring, image acquisition was performed using a CCD color camera (AxioCam MRc; Carl Zeiss AG, Jena, Germany) mounted on a conventional light microscope (AxioPhot; Carl Zeiss AG, Jena, Germany) and attached to a personal computer. Images were acquired using a x20 objective (Plan Neofluar, NA = 0.5, resulting in specimen level pixel size of  $0.53 \times 0.53 \mu\text{m}^2$ ). Prior to analysis of the immunohistochemical staining, an image of an empty microscopic field was acquired, which was used for correction for unequal illumination. Image acquisition and analysis were performed using a custom written macro in KS400 image analysis software (Carl Zeiss), as described previously (29). Thresholds for recognition of CD34-positivity were determined from a set of training slides and were found adequate for almost all slides analyzed in this study. When the initial thresholds led to unrealistic patterns, interactive adjustment was performed by the operator. For each patient, the percentage of anti-CD34 stained area, the microvessel density and the vessel perimeter were calculated per surface area tumor in ten randomly selected images.

**SUPPLEMENTAL TABLE 1.** Patients characteristics and results for immunohistochemical markers of glucose uptake and metabolism and [<sup>18</sup>F]-fluorodeoxyglucose uptake

| Genotype              | Sex | Age (y) | Tumor dimensions (mm) | Tumor location | Tumor stage     | HK-2 | HK-3 | GLUT-1 | GLUT-3 | VEGF | MCT-4 | SUV max | SUV mean |
|-----------------------|-----|---------|-----------------------|----------------|-----------------|------|------|--------|--------|------|-------|---------|----------|
| Sporadic <sup>1</sup> | F   | 70      | 12 x 8 x 16           | EA             | metastasis      | 200  | 100  | 120    | 100    | 200  | 90    | 0.79    | 0.70     |
| Sporadic              | F   | 66      | 30 x 27 x 32          | RA             | primary         | 80   | 80   | 90     | 90     | 90   | 5     | 2.78    | 1.27     |
| Sporadic              | F   | 56      | 21 x 17 x 22          | RA             | primary         | 40   | 80   | 110    | 130    | 160  | 100   | 1.67    | 0.78     |
| Sporadic              | M   | 66      | 27 x 23 x 23          | RA             | rest tumor      | 0    | 60   | 0      | 80     | 90   | 90    | 1.93    | 1.14     |
| Sporadic              | F   | 75      | 35 x 26 x 37          | RA             | primary         | 270  | 80   | 25     | 180    | 270  | 100   | 5.82    | 2.81     |
| Sporadic              | M   | 44      | 23 x 26 x 32          | RA             | primary         | 90   | 60   | 40     | 150    | 80   | 60    | 2.32    | 1.08     |
| Sporadic              | M   | 70      | 52 x 40 x 50          | RA             | primary         | 0    | 40   | 20     | 0      | 5    | 20    | 1.28    | 0.62     |
| Sporadic              | M   | 41      | 22 x 22 x 21          | RA             | primary         | 190  | 120  | 66     | 210    | 180  | 30    | 0.83    | 0.60     |
| Sporadic              | M   | 36      | 70 x 63 x 60          | RA             | primary         | 20   | 60   | 100    | 10     | 150  | 40    | 2.15    | 0.90     |
| Sporadic              | M   | 49      | 75 x 56 x 73          | RA             | primary         | 0    | 10   | 165    | 110    | 90   | 160   | 2.28    | 0.97     |
| Sporadic              | F   | 53      | 35 x 32 x 33          | LA             | primary         | 50   | 120  | 120    | 150    | 160  | 160   | 1.87    | 1.10     |
| Sporadic              | M   | 20      | 78 x 52 x 70          | RA             | primary         | 160  | 20   | 15     | 180    | 180  | 270   | 4.58    | 1.63     |
| Sporadic              | M   | 62      | 31 x 35 x 38          | LA             | primary         | 180  | 30   | 160    | 90     | 180  | 160   | 1.64    | 0.95     |
| Sporadic              | F   | 50      | 50 x 52 x 53          | LA             | primary         | 90   | 160  | 60     | 150    | 150  | 270   | 3.06    | 1.62     |
| Sporadic              | F   | 55      | 43 x 40 x 50          | LA             | primary         | 110  | 160  | 200    | 90     | 140  | 160   | 6.47    | 3.26     |
| RET                   | M   | 36      | 17 x 13 x 20          | LA             | local relapse 2 | 35   | 160  | 30     | 160    | 90   | 80    | 1.61    | 1.01     |
| RET                   | M   | 36      | 23 x 19 x 30          | LA             | primary         | 150  | 40   | 85     | 150    | 180  | 40    | 1.57    | 0.83     |
| RET                   | M   | 44      | 27 x 18 x 38          | RA             | primary         | 20   | 180  | 100    | 160    | 130  | 200   | 2.42    | 1.25     |
| RET                   | M   | 71      | 22 x 17 x 17          | RA             | primary         | 50   | 160  | 50     | 160    | 90   | 160   | 1.83    | 0.99     |
| RET                   | F   | 47      | 49 x 45 x 45          | RA             | primary         | 30   | 70   | 10     | 50     | 150  | 70    | 1.90    | 1.11     |
| MAX                   | M   | 63      | 38 x 25 x 41          | LA             | local relapse 1 | 100  | 90   | 30     | 70     | 90   | 30    | 2.30    | 0.99     |
| NF1                   | F   | 70      | 46 x 33 x 65          | RA             | primary         | 70   | 70   | 90     | 70     | 10   | 70    | 1.97    | 0.94     |
| SDHD                  | M   | 32      | 21 x 14 x 21          | EA             | primary         | 120  | 180  | 30     | 200    | 200  | 160   | 10.2    | 3.99     |
| SDHD                  | F   | 60      | 55 x 45 x 50          | EA             | primary         | 210  | 140  | 110    | 200    | 270  | 60    | 9.28    | 5.42     |
| SDHD                  | M   | 46      | 30 x 30 x 21          | RA             | primary         | 280  | 160  | 60     | 90     | 180  | 80    | 1.64    | 0.95     |
| SDHB                  | M   | 41      | 22 x 22 x 20          | EA             | local relapse 2 | 230  | 200  | 200    | 90     | 180  | 160   | 11.8    | 4.93     |
| SDHB                  | M   | 21      | 13 x 14 x 17          | EA             | primary         | 200  | 90   | 20     | 150    | 270  | 270   | 8.83    | 4.76     |

Abbreviations: M=male; F=female; y = years; EA = extra-adrenal; LA = left adrenal; RA = right adrenal; HK-2 = hexokinase-2; HK-3 = hexokinase-3; GLUT-1 = glucose transporter type 1; GLUT-3 = glucose transporter type 3; VEGF = vascular endothelial growth factor; MCT-4 = monocarboxylate transporter type 4; SUV = standard uptake value (max = maximum).

<sup>1</sup> Patients were tested for the presence of germline mutations and large deletions in SDHB/C/D, RET, VHL and -since 2011- in SHDA, SDHAF2, TMEM127 and MAX.

**SUPPLEMENTAL TABLE 2.** Details of antibodies used for immunohistochemistry

| Primary antibody | Host   | Concentration (µg/ml) | Manufacturer / Catalog number                 | Secondary antibody                                | Concentration (µg/ml) | Manufacturer / Catalog number |
|------------------|--------|-----------------------|-----------------------------------------------|---------------------------------------------------|-----------------------|-------------------------------|
| HK-1             | Goat   | 10                    | Santa Cruz Biotechnology SC 6518              | Rabbit anti goat biotin                           | 4                     | DAKO, EO466                   |
| HK-2             | Goat   | 3                     | Santa Cruz Biotechnology SC 6521              |                                                   |                       |                               |
| HK-3             | Goat   | 10                    | Santa Cruz Biotechnology SC 6523              |                                                   |                       |                               |
| GLUT-1           | Rabbit | 1                     | Thermo Scientific RB-9052-PO                  | Goat anti rabbit biotin                           | 7.5                   | Vector Laboratories, BA-1000  |
| GLUT-3           | Mouse  | Neat                  | Thermo Scientific PA1-28204                   | Goat polyclonal anti-mouse/rat/ rabbit peroxidase | 1:1 of neat           | Immunologic, DPVO 110HRP      |
| MCT-4            | Rabbit | 5                     | Millipore AB3316P                             |                                                   |                       |                               |
| VEGF             | Rabbit | 32                    | Gifted by dept. of Laboratory Medicine, RUNMC |                                                   |                       |                               |
| CD-34            | Mouse  | 1:200                 | Immunologic ILM 1343                          |                                                   |                       | Immunologic, DVPO 999HRP      |

**SUPPLEMENTAL FIGURE 1.** Expression of (A) Hexokinase 2 and (B) glucose transporter type 3 mRNA in PGL tumors. Expression of mRNAs in PPGL tumors was investigated using qPCR and their relative expression levels across different genotypes are plotted. Groups with different letters as superscripts are significantly different.

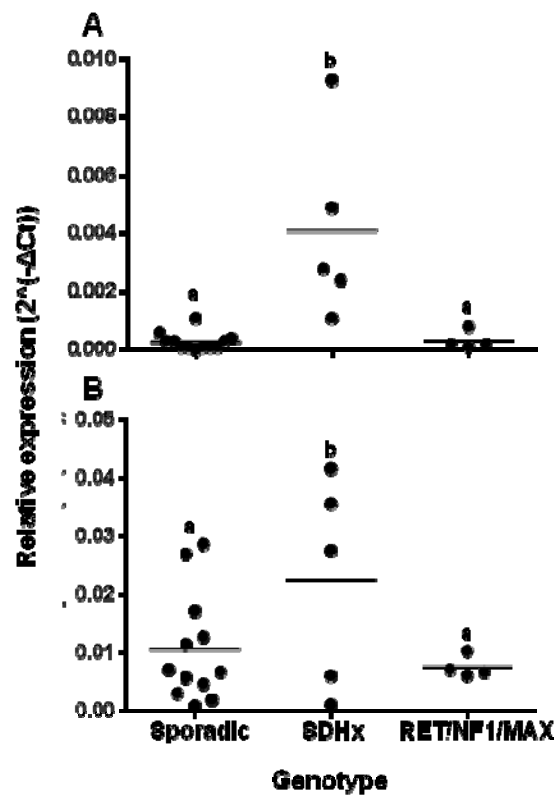

Supplement: 137034_Supplemental_Data.pdf [file 137034_Supplemental_Data.pdf]
